# Supplementary material for: Gene-based analyses of the maternal genome implicate maternal effect genes as risk factors for conotruncal heart defects
Source: PubMed Central journal article supplement (PMC7282656; doi:10.1371/journal.pone.0234357), 2020-06-09

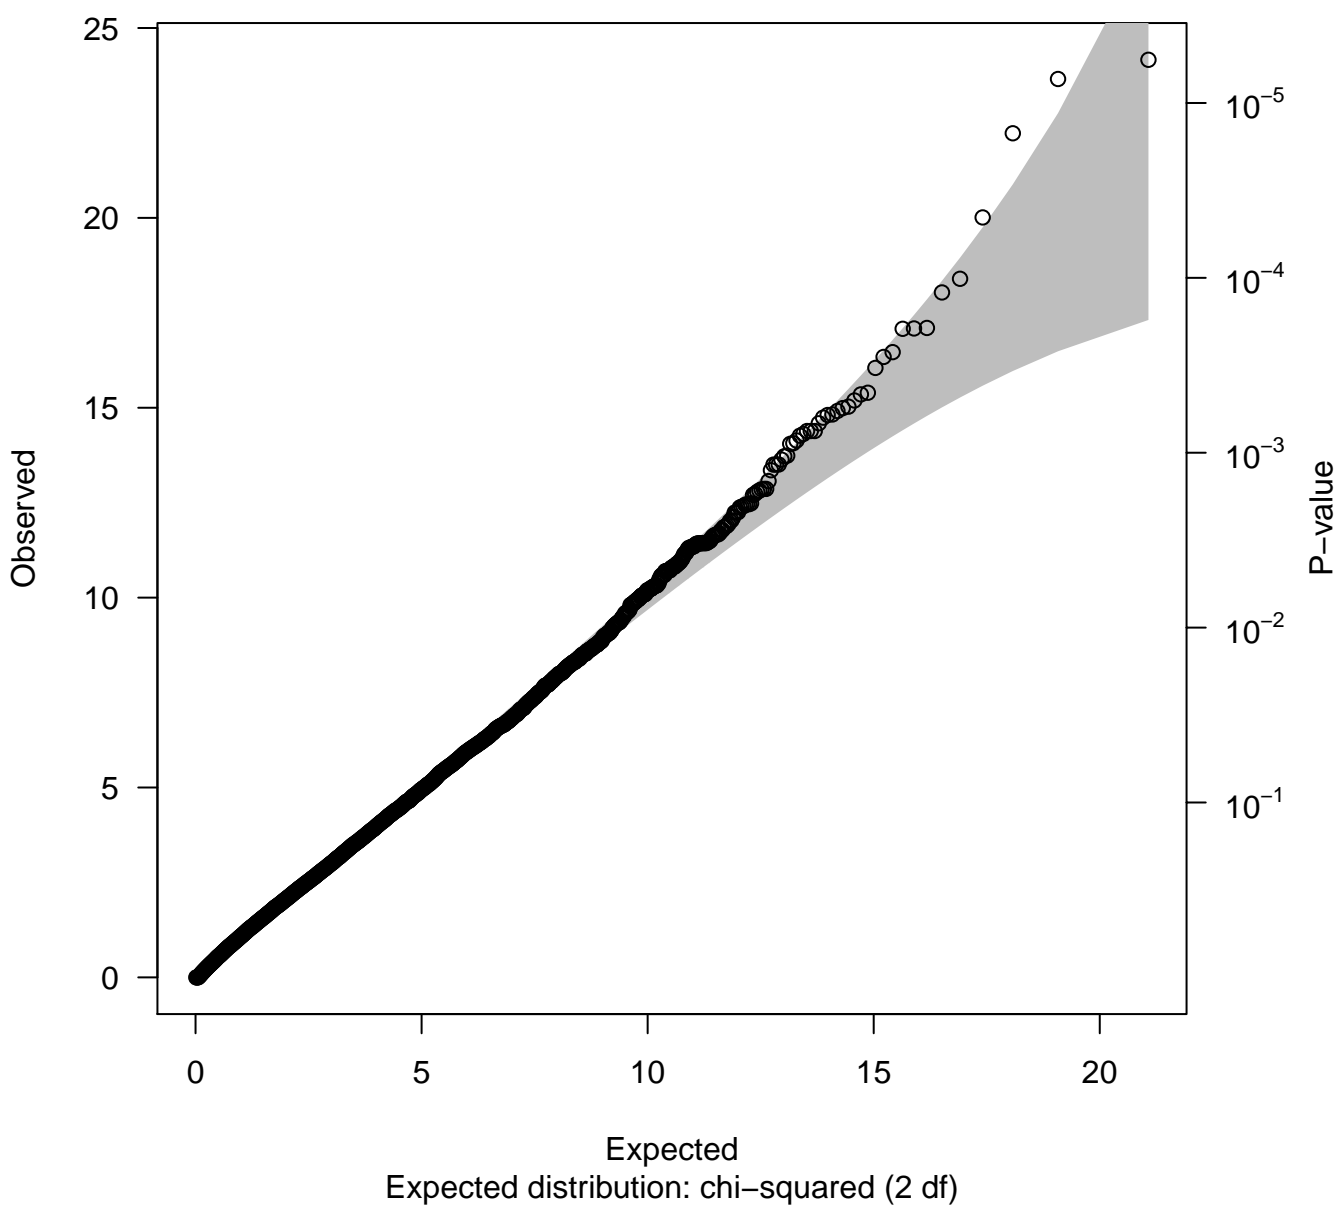

Supplement: pone.0234357.s001.pdf [file pone.0234357.s001.pdf]
